# Supplementary material for: Suppression of N2O formation by H2O and SO2 in the selective catalytic reduction of NO with NH3 over a Mn/Ti–Si catalyst
Source: Royal Society of Chemistry journal article supplement (doi:10.1039/c9cy01156k), 2019-01-01
Supplement: c9cy01156k1.pdf [file c9cy01156k1.pdf]

23 show that the pore diameter of both Ti–Si support and Mn/Ti–Si catalyst range mainly  
 24 from 6 to 21 nm.

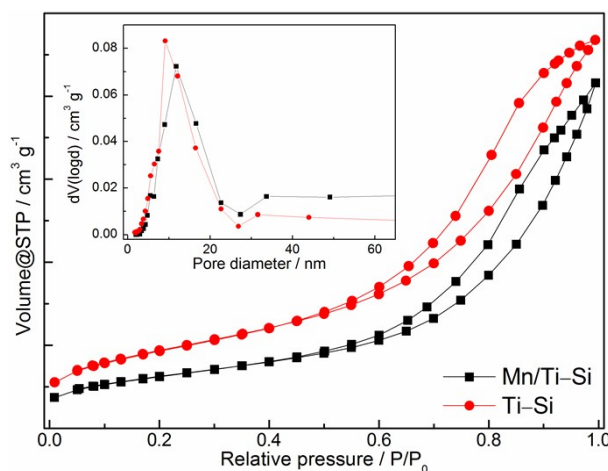

25  
 26 Figure S2. Nitrogen adsorption-desorption isotherms and the corresponding BJH desorption pore  
 27 distribution (insert) for Mn/Ti–Si catalyst and Ti–Si support.

28 As shown in Table S1, the average pore diameter of Ti–Si support increased from  
 29 8.6 to 11.5 nm and the pore volume decreased from 0.36 to 0.32 cm<sup>3</sup> g<sup>-1</sup> after the  
 30 impregnation of Mn component. Additionally, the BET surface area decreased from  
 31 168 to 112 m<sup>2</sup> g<sup>-1</sup>. These results indicate that a part of the small pores of Ti–Si support  
 32 were blocked after impregnation.

33 Table S1 BET surface area, average pore diameter and pore volume for Ti–Si and Mn/Ti–Si.

| Samples  | BET surface area /<br>m <sup>2</sup> g <sup>-1</sup> | Average pore<br>diameter / nm | Pore volume /<br>cm <sup>3</sup> g <sup>-1</sup> |
|----------|------------------------------------------------------|-------------------------------|--------------------------------------------------|
| Mn/Ti–Si | 112                                                  | 11.5                          | 0.32                                             |
| Ti–Si    | 168                                                  | 8.6                           | 0.36                                             |

34

35 Table S2 H<sub>2</sub> consumption of MnO<sub>x</sub> and MnSO<sub>4</sub> reduction for different samples.

| Samples                                                       | H <sub>2</sub> consumption / mmol g <sup>-1</sup>                                     |                                |
|---------------------------------------------------------------|---------------------------------------------------------------------------------------|--------------------------------|
|                                                               | MnO <sub>2</sub> –Mn <sub>2</sub> O <sub>3</sub> –Mn <sub>3</sub> O <sub>4</sub> –MnO | Reduction of MnSO <sub>4</sub> |
| Fresh Mn/Ti–Si                                                | 3.92                                                                                  | –                              |
| Mn/Ti–Si regenerated by NH <sub>3</sub> at<br>350 °C for 5h   | 3.75                                                                                  | 0.25                           |
| Mn/Ti–Si after SCR with SO <sub>2</sub> at<br>200 °C for 1.5h | 2.87                                                                                  | 1.56                           |
| MnSO <sub>4</sub> /Ti–Si calcined at 400 °C                   | 1.10                                                                                  | 3.66                           |

36

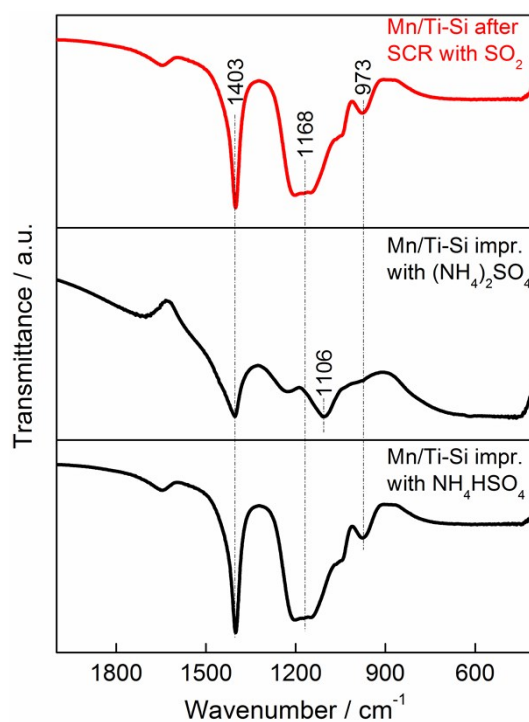

37

38 Figure S3. IR spectra for Mn/Ti–Si after SCR with 50 ppm SO<sub>2</sub> at 200 °C for 20h, and Mn/Ti–Si  
39 impregnated with (NH<sub>4</sub>)<sub>2</sub>SO<sub>4</sub> and NH<sub>4</sub>HSO<sub>4</sub>.

40

41 The proposed decomposition reaction of (NH<sub>4</sub>)<sub>2</sub>SO<sub>4</sub> and NH<sub>4</sub>HSO<sub>4</sub><sup>1, 2</sup>:

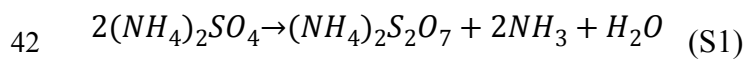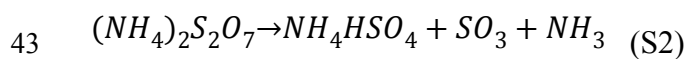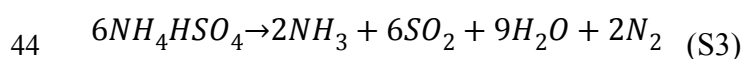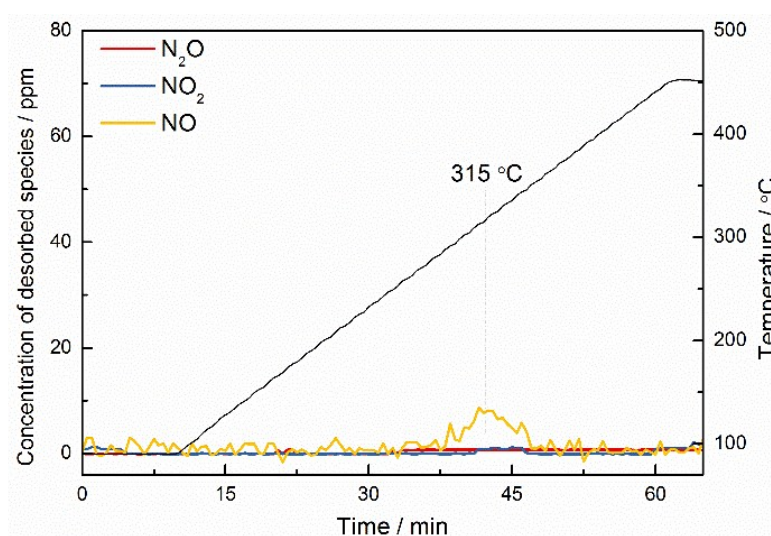

45

46 Figure S4. NO<sub>x</sub>-TPD profile for Mn/Ti-Si after SCR with 50 ppm SO<sub>2</sub> at 200 °C for 20h.

47 The N<sub>2</sub> selectivity was calculated according to the following formula:

48 
$$N_2 \text{ selectivity} = \frac{[NO]_{in} - [NO]_{out} - [NO_2]_{out} - 2[N_2O]_{out}}{[NO]_{in} - [NO]_{out}} \times 100 \% \quad (S1)$$

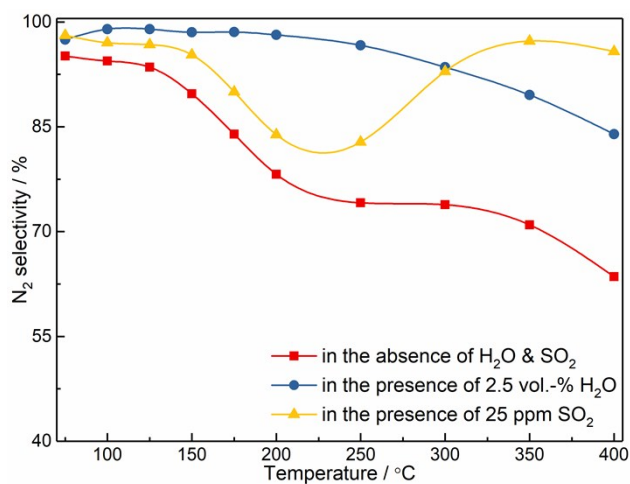

49

50 Figure S5. N<sub>2</sub> selectivity for SCR reaction in the absence of H<sub>2</sub>O and SO<sub>2</sub>, in the presence of 2.5 vol.-%

51 H<sub>2</sub>O and in the presence of 25 ppm SO<sub>2</sub> over Mn/Ti-Si catalyst ([NO] = 500 ppm, [NH<sub>3</sub>] = 575 ppm,

52 [O<sub>2</sub>] = 4 %, He balance and GHSV = 50 000 h<sup>-1</sup>).

53

54 1. H. I. Saleh and K. M. Hassan, *J. Chem. Technol. Biot.*, 2004, **79**, 397-402.

55 2. C. K. Pang, Y. Q. Zhuo and Y. D. Qin, *Proceedings of 2018 2nd International Conference*  
56 *on Green Energy and Applications*, 2018, 254-262.
